# Supplementary material for: p75NTR antagonists attenuate photoreceptor cell loss in murine models of retinitis pigmentosa
Source: PubMed Central journal article supplement (PMC5550853; doi:10.1038/cddis.2017.306), 2017-07-13
Supplement: cddis2017306x1.pdf [file cddis2017306x1.pdf]

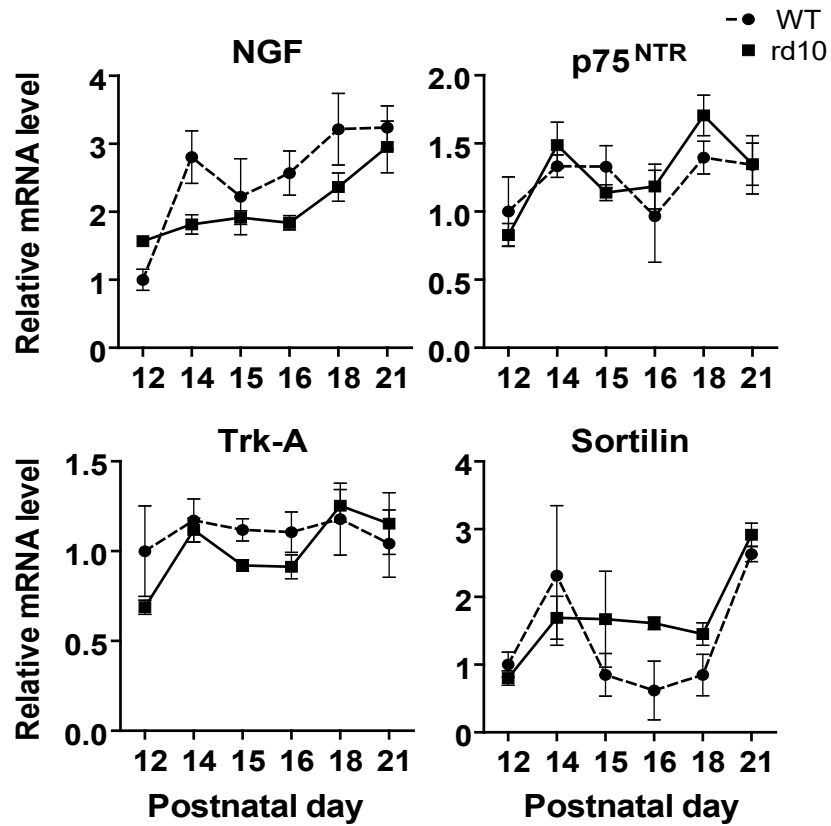

**Supplementary Figure 1. NGF system components in the WT and *rd10* mouse retina.** RT-qPCR of WT and *rd10* retinas at the indicated ages. The levels of the different transcripts were normalized to the TBP RNA levels and relativized to P12 WT level (= 1). Results represent the mean  $\pm$  S.E.M.  $n \geq 3$ .
