# Supplementary material for: p75NTR antagonists attenuate photoreceptor cell loss in murine models of retinitis pigmentosa
Source: PubMed Central journal article supplement (PMC5550853; doi:10.1038/cddis.2017.306), 2017-07-13
Supplement: cddis2017306x2.pdf [file cddis2017306x2.pdf]

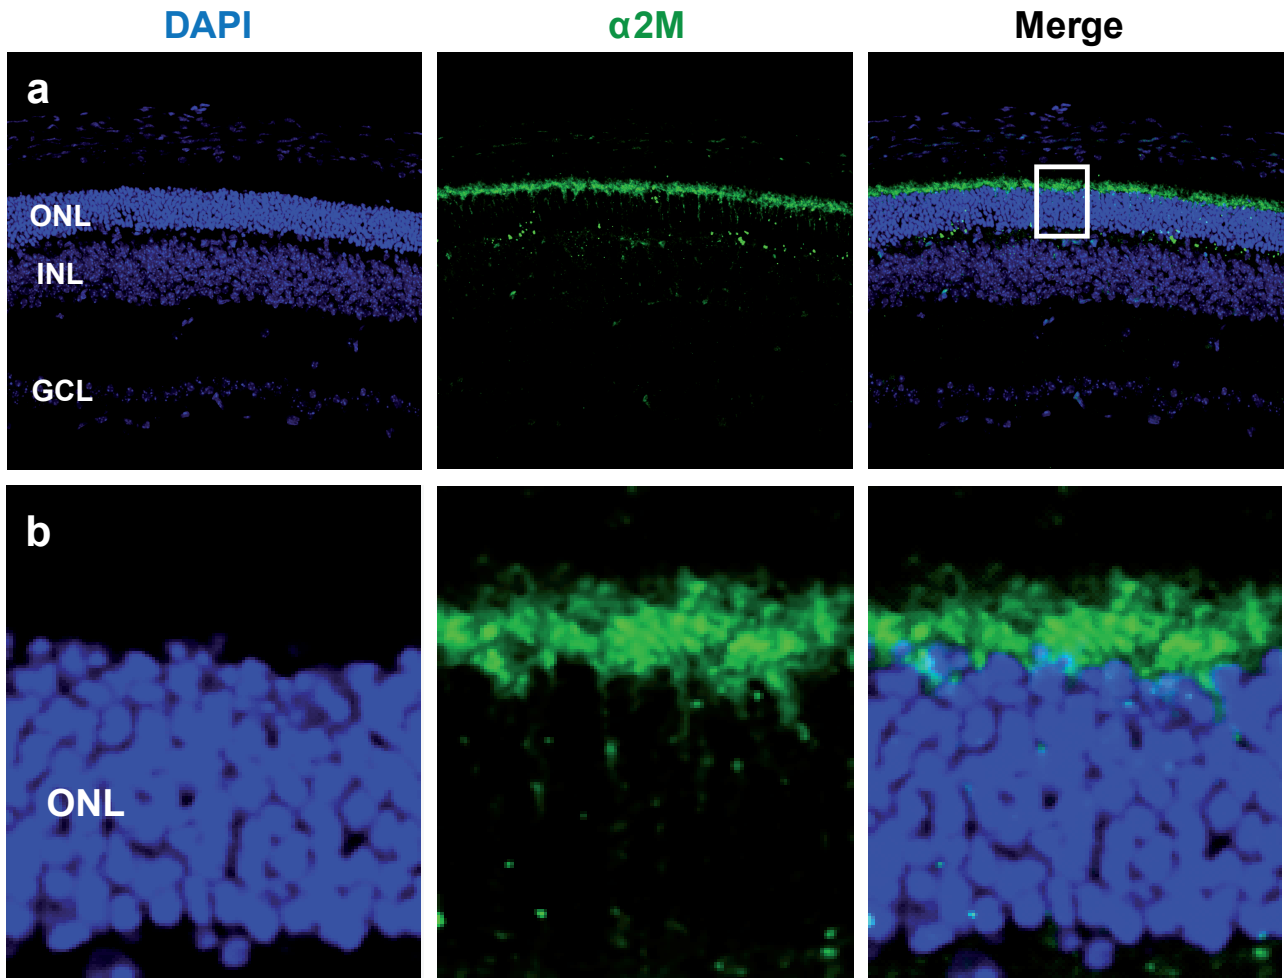

**Supplementary Figure 2.  $\alpha$ 2M localization in the *rd10* retina.** Magnification of  $\alpha$ 2M immunostaining (green) in a representative P21 retinal section from a *rd10* mouse, counterstained with DAPI (blue). (a) Section showed in Fig. 2c. (b) Magnification of the inset zone.
