# Supplementary material for: p75NTR antagonists attenuate photoreceptor cell loss in murine models of retinitis pigmentosa
Source: PubMed Central journal article supplement (PMC5550853; doi:10.1038/cddis.2017.306), 2017-07-13
Supplement: cddis2017306x3.pdf [file cddis2017306x3.pdf]

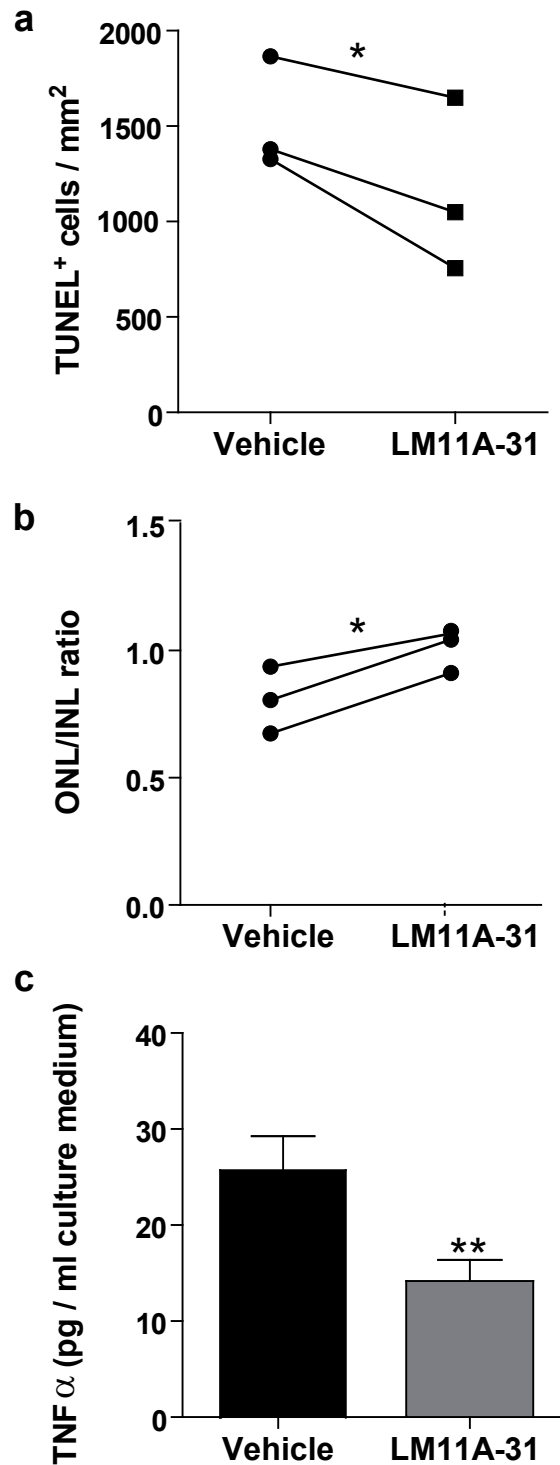

**Supplementary Figure 3. Effect of p75<sup>NTR</sup> antagonist LM11A-31 in *rd10* retinal explants.** Retinas were cultured for 24 h. Photoreceptor cell death (a) was quantified by TUNEL and the ONL/INL thickness ratio (b) was compared between paired treated and control eyes. TNF $\alpha$  concentration (c) was quantified in the culture media by ELISA. Bars represent mean  $\pm$  S.E.M.; n=3 (a and b), n = 7 (c); \*p < 0.05; \*\*p < 0.01.
